# Supplementary material for: Association of Polymorphisms of IL-6 Pathway Genes (IL6, IL6R and IL6ST) with COVID-19 Severity in an Amazonian Population
Source: MDPI journal article supplement (doi:10.3390/v15051197), 2023-05-19
Supplement: s1 [file s1]

**Supplementary Table S1.** Minor Allele Frequencies of studied SNP in different ethnic worldwide populations obtained from ENSEMBL database [18-20] and in Non-Hospitalized and Hospitalized patients subgroups, according their ethnic classification.

| Population | rs1800795 [C] | rs2228145 [C] | rs7730934 [A] |
|------------|---------------|---------------|---------------|
| Europe     | 0.42          | 0.36          | 0.112         |
| Africa     | 0.018         | 0.087         | 0.508         |
| America    | 0.184         | 0.536         | 0.12          |
| NHSP       | 0.13          | 0.4           | 0.2           |
| NHSP White | 0.25          | 0.38          | 0.16          |
| NHSP Black | 0.17          | 0.37          | 0.24          |
| NHSP Brown | 0.23          | 0.41          | 0.16          |
| HSP        | 0.17          | 0.42          | 0.18          |
| HSP White  | 0.28          | 0.42          | 0.15          |
| HSP Black  | 0.15          | 0.3           | 0.25          |
| HSP Brown  | 0.3           | 0.43          | 0.2           |

There are no statistically significant differences (Fisher exact test) between Whites, Blacks and Browns subgroups of both NHSP and HSP groups. NHSP=non-hospitalized; HSP=hospitalized.
